# Supplementary material
Source: HighWire-hosted journal article supplement (https://jech.bmj.com/content/72/9/838)
Supplement: inline-supplementary-material-1 [file inline-supplementary-material-1.pdf]

## Appendix

### Table A1. Relative Mortality Risks by Five Causes of Death

| Status   | Cause       | Men  |             | Women |             |
|----------|-------------|------|-------------|-------|-------------|
|          |             | RR   | CI          | RR    | CI          |
| Married  | Circulatory | 1    |             | 1     |             |
| Single   | Circulatory | 1.36 | (1.26-1.47) | 1.41  | (1.28-1.55) |
| Divorced | Circulatory | 1.32 | (1.22-1.44) | 1.22  | (1.11-1.35) |
| Widowed  | Circulatory | 1.32 | (1.22-1.42) | 1.54  | (1.44-1.64) |
| Married  | Cancer      | 1.00 | (0.96-1.04) | 1.21  | (1.15-1.27) |
| Single   | Cancer      | 0.85 | (0.78-0.94) | 1.16  | (1.05-1.29) |
| Divorced | Cancer      | 1.22 | (1.12-1.33) | 1.52  | (1.39-1.67) |
| Widowed  | Cancer      | 0.89 | (0.82-0.97) | 0.92  | (0.86-0.99) |
| Married  | Respiratory | 0.33 | (0.32-0.35) | 0.35  | (0.32-0.37) |
| Single   | Respiratory | 0.49 | (0.44-0.56) | 0.60  | (0.53-0.69) |
| Divorced | Respiratory | 0.49 | (0.43-0.56) | 0.63  | (0.55-0.71) |
| Widowed  | Respiratory | 0.53 | (0.48-0.59) | 0.58  | (0.54-0.63) |
| Married  | Digestive   | 0.12 | (0.11-0.13) | 0.18  | (0.16-0.19) |
| Single   | Digestive   | 0.29 | (0.25-0.34) | 0.23  | (0.18-0.28) |
| Divorced | Digestive   | 0.27 | (0.23-0.31) | 0.34  | (0.28-0.4)  |
| Widowed  | Digestive   | 0.15 | (0.12-0.18) | 0.19  | (0.17-0.22) |
| Married  | Nervous     | 0.10 | (0.09-0.11) | 0.12  | (0.11-0.13) |
| Single   | Nervous     | 0.15 | (0.12-0.18) | 0.15  | (0.12-0.2)  |
| Divorced | Nervous     | 0.08 | (0.06-0.1)  | 0.16  | (0.12-0.2)  |
| Widowed  | Nervous     | 0.07 | (0.06-0.09) | 0.12  | (0.11-0.14) |
| Married  | Other       | 0.28 | (0.26-0.3)  | 0.40  | (0.37-0.43) |
| Single   | Other       | 0.68 | (0.62-0.76) | 0.76  | (0.67-0.86) |
| Divorced | Other       | 0.50 | (0.44-0.57) | 0.54  | (0.47-0.62) |
| Widowed  | Other       | 0.39 | (0.35-0.44) | 0.64  | (0.59-0.69) |

**Table A2. Relative Mortality Risks by Seven Causes of Death.**

| PS status      | Cause       | Men 30-85 |             |      |             | Women 30-85 |             |      |             |
|----------------|-------------|-----------|-------------|------|-------------|-------------|-------------|------|-------------|
|                |             | RR        | CI          | RR   | CI          | RR          | CI          | RR   | CI          |
| Married        | Circulatory | 1         |             | 1    |             | 1           |             | 1    |             |
| Single         | Circulatory | 1.37      | (1.26-1.48) | 1.44 | (1.33-1.57) | 1.39        | (1.26-1.53) | 1.45 | (1.31-1.6)  |
| Divorced       | Circulatory | 1.33      | (1.23-1.44) | 1.41 | (1.29-1.54) | 1.22        | (1.11-1.34) | 1.26 | (1.14-1.4)  |
| Widowed        | Circulatory | 1.33      | (1.23-1.43) | 1.37 | (1.27-1.48) | 1.53        | (1.44-1.63) | 1.56 | (1.46-1.66) |
| Premarital C.  | Circulatory |           |             | 0.77 | (0.55-1.08) |             |             | 0.46 | (0.23-0.92) |
| Postmarital C. | Circulatory |           |             | 1.08 | (0.89-1.31) |             |             | 0.84 | (0.62-1.14) |
| Married        | Cancer      | 0.99      | (0.95-1.03) | 0.99 | (0.95-1.03) | 1.19        | (1.13-1.25) | 1.19 | (1.13-1.25) |
| Single         | Cancer      | 0.85      | (0.77-0.93) | 0.86 | (0.78-0.95) | 1.12        | (1.01-1.24) | 1.11 | (1-1.24)    |
| Divorced       | Cancer      | 1.22      | (1.12-1.33) | 1.22 | (1.11-1.34) | 1.51        | (1.38-1.65) | 1.48 | (1.35-1.63) |
| Widowed        | Cancer      | 0.87      | (0.8-0.94)  | 0.90 | (0.82-0.98) | 0.89        | (0.83-0.95) | 0.90 | (0.84-0.96) |
| Premarital C.  | Cancer      |           |             | 0.95 | (0.7-1.29)  |             |             | 1.49 | (1.01-2.21) |
| Postmarital C. | Cancer      |           |             | 1.35 | (1.14-1.61) |             |             | 1.86 | (1.51-2.28) |
| Married        | Respiratory | 0.34      | (0.32-0.36) | 0.34 | (0.32-0.36) | 0.35        | (0.32-0.37) | 0.35 | (0.32-0.37) |
| Single         | Respiratory | 0.50      | (0.45-0.56) | 0.54 | (0.48-0.61) | 0.59        | (0.51-0.67) | 0.61 | (0.53-0.7)  |
| Divorced       | Respiratory | 0.49      | (0.43-0.56) | 0.55 | (0.48-0.63) | 0.63        | (0.55-0.71) | 0.66 | (0.58-0.75) |
| Widowed        | Respiratory | 0.54      | (0.49-0.6)  | 0.56 | (0.51-0.62) | 0.58        | (0.54-0.63) | 0.59 | (0.54-0.63) |
| Premarital C.  | Respiratory |           |             | 0.16 | (0.08-0.33) |             |             | 0.23 | (0.09-0.61) |
| Postmarital C. | Respiratory |           |             | 0.25 | (0.17-0.38) |             |             | 0.40 | (0.26-0.62) |
| Married        | Digestive   | 0.08      | (0.08-0.09) | 0.08 | (0.08-0.09) | 0.14        | (0.12-0.15) | 0.14 | (0.12-0.15) |
| Single         | Digestive   | 0.18      | (0.15-0.21) | 0.18 | (0.15-0.22) | 0.17        | (0.13-0.21) | 0.17 | (0.13-0.21) |
| Divorced       | Digestive   | 0.14      | (0.11-0.18) | 0.16 | (0.12-0.2)  | 0.22        | (0.18-0.26) | 0.22 | (0.18-0.28) |
| Widowed        | Digestive   | 0.13      | (0.11-0.15) | 0.13 | (0.11-0.16) | 0.18        | (0.17-0.2)  | 0.19 | (0.17-0.21) |
| Premarital C.  | Digestive   |           |             | 0.14 | (0.06-0.3)  |             |             | 0.23 | (0.09-0.61) |
| Postmarital C. | Digestive   |           |             | 0.07 | (0.03-0.15) |             |             | 0.13 | (0.06-0.28) |
| Married        | Nervous     | 0.10      | (0.09-0.11) | 0.10 | (0.09-0.11) | 0.12        | (0.11-0.13) | 0.12 | (0.11-0.13) |
| Single         | Nervous     | 0.15      | (0.12-0.18) | 0.16 | (0.13-0.19) | 0.15        | (0.11-0.19) | 0.15 | (0.12-0.2)  |

|                |           |      |             |      |             |      |             |      |             |
|----------------|-----------|------|-------------|------|-------------|------|-------------|------|-------------|
| Divorced       | Nervous   | 0.08 | (0.06-0.1)  | 0.09 | (0.07-0.12) | 0.15 | (0.12-0.19) | 0.15 | (0.11-0.19) |
| Widowed        | Nervous   | 0.07 | (0.06-0.09) | 0.08 | (0.06-0.1)  | 0.12 | (0.11-0.14) | 0.13 | (0.11-0.14) |
| Premarital C.  | Nervous   |      |             | 0.07 | (0.02-0.21) |      |             | 0.00 |             |
| Postmarital C. | Nervous   |      |             | 0.02 | (0.01-0.08) |      |             | 0.17 | (0.09-0.33) |
| Married        | Other     | 0.22 | (0.21-0.23) | 0.22 | (0.21-0.23) | 0.34 | (0.32-0.37) | 0.34 | (0.32-0.37) |
| Single         | Other     | 0.46 | (0.41-0.52) | 0.48 | (0.42-0.54) | 0.63 | (0.55-0.72) | 0.65 | (0.57-0.74) |
| Divorced       | Other     | 0.32 | (0.27-0.37) | 0.33 | (0.28-0.38) | 0.39 | (0.34-0.46) | 0.41 | (0.35-0.48) |
| Widowed        | Other     | 0.34 | (0.3-0.38)  | 0.35 | (0.31-0.39) | 0.58 | (0.54-0.62) | 0.58 | (0.54-0.63) |
| Premarital C.  | Other     |      |             | 0.36 | (0.22-0.59) |      |             | 0.34 | (0.15-0.77) |
| Postmarital C. | Other     |      |             | 0.35 | (0.25-0.48) |      |             | 0.29 | (0.17-0.48) |
| Married        | Alcohol   | 0.06 | (0.05-0.06) | 0.06 | (0.05-0.06) | 0.06 | (0.05-0.07) | 0.06 | (0.05-0.07) |
| Single         | Alcohol   | 0.20 | (0.16-0.23) | 0.20 | (0.16-0.24) | 0.12 | (0.09-0.16) | 0.12 | (0.09-0.16) |
| Divorced       | Alcohol   | 0.17 | (0.14-0.21) | 0.16 | (0.13-0.2)  | 0.13 | (0.1-0.16)  | 0.13 | (0.1-0.17)  |
| Widowed        | Alcohol   | 0.05 | (0.04-0.07) | 0.06 | (0.04-0.08) | 0.07 | (0.06-0.08) | 0.07 | (0.06-0.08) |
| Premarital C.  | Alcohol   |      |             | 0.25 | (0.14-0.45) |      |             | 0.17 | (0.06-0.54) |
| Postmarital C. | Alcohol   |      |             | 0.21 | (0.14-0.33) |      |             | 0.13 | (0.06-0.28) |
| Married        | Accidents | 0.04 | (0.03-0.04) | 0.04 | (0.03-0.04) | 0.04 | (0.03-0.05) | 0.04 | (0.03-0.05) |
| Single         | Accidents | 0.14 | (0.11-0.17) | 0.14 | (0.11-0.17) | 0.06 | (0.04-0.09) | 0.06 | (0.04-0.09) |
| Divorced       | Accidents | 0.14 | (0.11-0.18) | 0.15 | (0.12-0.19) | 0.14 | (0.11-0.18) | 0.13 | (0.1-0.17)  |
| Widowed        | Accidents | 0.02 | (0.02-0.04) | 0.02 | (0.02-0.04) | 0.01 | (0.01-0.02) | 0.01 | (0.01-0.02) |
| Premarital C.  | Accidents |      |             | 0.14 | (0.06-0.3)  |      |             | 0.23 | (0.09-0.61) |
| Postmarital C. | Accidents |      |             | 0.13 | (0.08-0.23) |      |             | 0.17 | (0.09-0.33) |
